# Supplementary material for: In situ interactive characteristics of reactive minerals in soil colloids and soil carbon preservation differentially revealed by nanoscale secondary ion mass spectrometry and X-ray absorption fine structure spectroscopy
Source: Copernicus journal article supplement (doi:10.5194/bg-2015-625), 2016-01-20
Supplement: Supplementary file [file bg-2015-625-AC1-supplement.zip]

Supplementary Information (SI) for

~~*In situ* interactive characteristics of highly reactive minerals in soil  
colloids and carbon preservation differentially revealed by  
nanoseal secondary ion mass spectrometry and X-ray absorption  
fine structure spectroscopy~~

New strategies for submicron characterization the carbon binding of reactive  
minerals in long-term contrasting fertilized soils: Implications for soil carbon  
storage

10 **Jian Xiao et al.**

\* Correspondence to: G. H. Yu ([yuguanghui@njau.edu.cn](mailto:yuguanghui@njau.edu.cn) or [gyu6@ncsu.edu](mailto:gyu6@ncsu.edu))

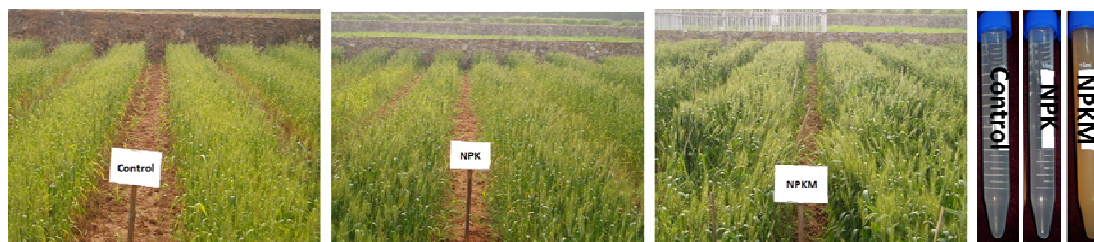

15 **Fig. S1** Field fertilization layout and extracted soil (Ferralic Cambisol) colloids from three 24-year (1990-2014) long-term fertilization treatments. Control, no fertilization; NPK, chemical nitrogen, phosphorus and potassium fertilization; NPKM, chemical NPK plus swine manure fertilization.

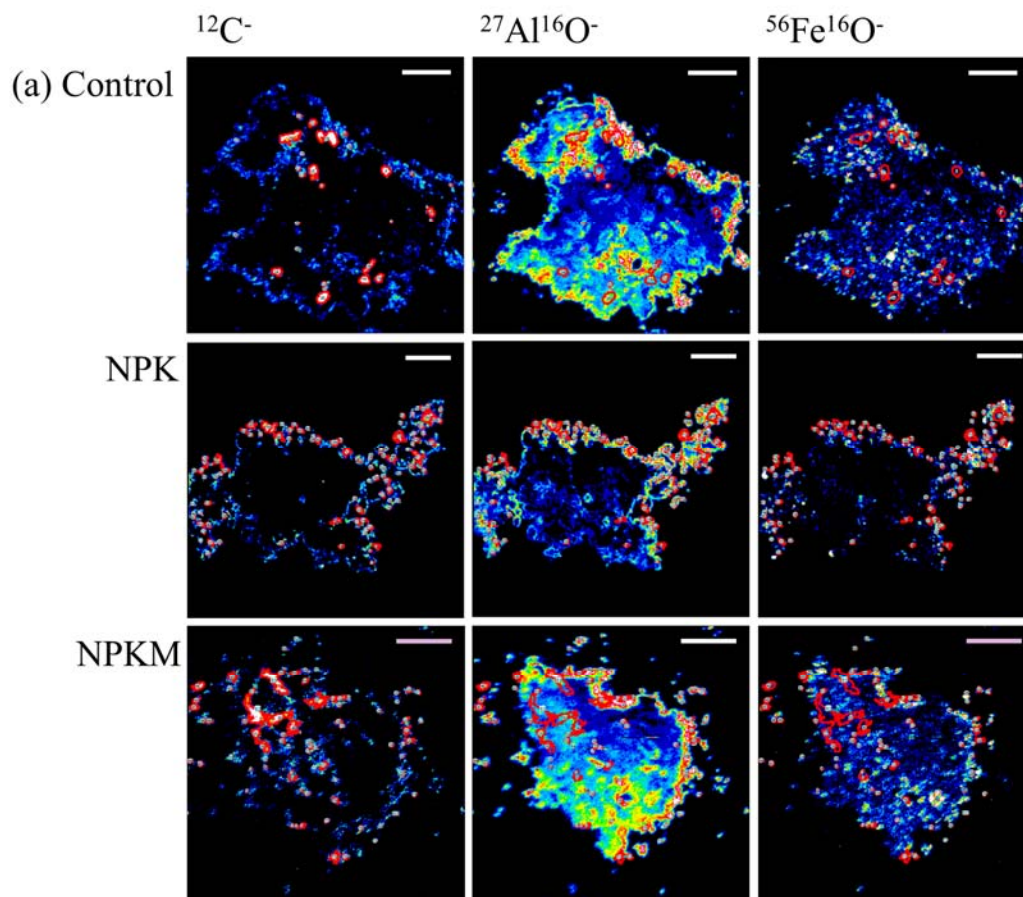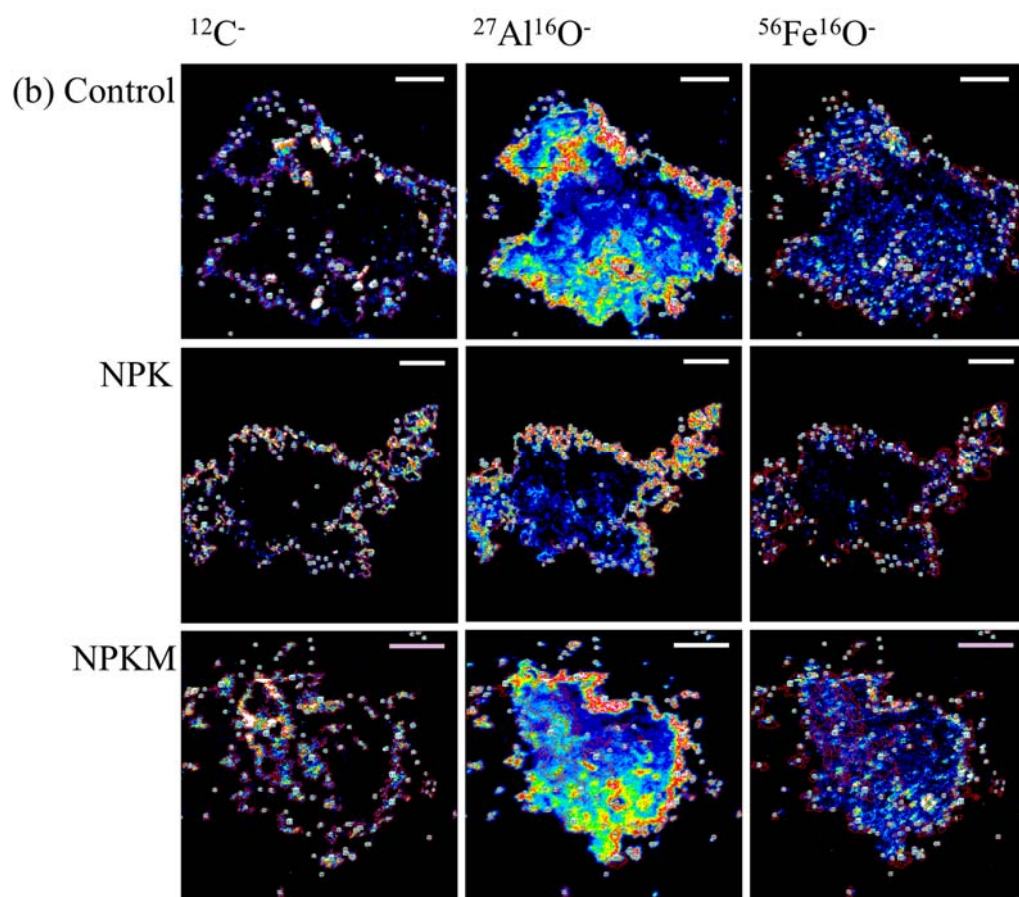

**Fig. S2** Region of interests (ROIs) (circled by red line) of  $^{12}\text{C}^-$ ,  $^{27}\text{Al}^{16}\text{O}^-$  and  $^{56}\text{Fe}^{16}\text{O}^-$  presenting on the NanoSIMS images in soil (Ferralic Cambisol) colloids extracted from three 24-year (1990-2014) long-term fertilization treatments. NanoSIMS images of (a) the  $^{12}\text{C}^-$  rich ROIs of  $^{12}\text{C}^-$ ,  $^{27}\text{Al}^{16}\text{O}^-$  and  $^{56}\text{Fe}^{16}\text{O}^-$  ~~and of~~ (b) the  $^{12}\text{C}^-$  less rich ROIs of  $^{12}\text{C}^-$ ,  $^{27}\text{Al}^{16}\text{O}^-$  and  $^{56}\text{Fe}^{16}\text{O}^-$ . Control, no fertilization,  $28 \times 28 \mu\text{m}^2$ ; NPK, chemical nitrogen, phosphorus and potassium fertilization,  $30 \times 30 \mu\text{m}^2$ ; NPKM, chemical NPK plus swine manure fertilization,  $25 \times 25 \mu\text{m}^2$ . Note that the color intensity calibration bar displayed in the chemical maps corresponds to the relative concentrations of individual elements, but cannot be used to compare one element to another. Bar =  $5 \mu\text{m}$ .

32 **Table S1. Annual fertilization rates between 1990 and 2014 in Qiyang, China <sup>a</sup>.**

| Treatment | Wheat                    |                        |                        |                        | Corn                     |                        |                        |                        |
|-----------|--------------------------|------------------------|------------------------|------------------------|--------------------------|------------------------|------------------------|------------------------|
|           | N (kg ha <sup>-1</sup> ) | P                      | K                      | Swine manure           | N (kg ha <sup>-1</sup> ) | P                      | K                      | Swine manure           |
|           |                          | (kg ha <sup>-1</sup> ) | (kg ha <sup>-1</sup> ) | (Mg ha <sup>-1</sup> ) |                          | (kg ha <sup>-1</sup> ) | (kg ha <sup>-1</sup> ) | (Mg ha <sup>-1</sup> ) |
| Control   | 0                        | 0                      | 0                      | 0                      | 0                        | 0                      | 0                      | 0                      |
| NPK       | 27                       | 16                     | 31                     | 0                      | 63                       | 37                     | 73                     | 0                      |
| NPKM      | 90                       | 16                     | 31                     | 10-15                  | 210                      | 37                     | 73                     | 25-35                  |

<sup>a</sup>Note: N fertilizer was as urea, P as calcium superphosphate, K as KCl. Swine manure was calculated in fresh weight. Control, no fertilization; NPK, chemical nitrogen, phosphorus and potassium fertilization; NPKM, chemical NPK plus swine manure fertilization.

33

34 **Table S2. Quantification of  $^{12}\text{C}^-$  rich ( $^{12}\text{C}^-$ -R) and  $^{12}\text{C}^-$  less-rich ( $^{12}\text{C}^-$ -LR) region of interests (ROIs) <sup>a</sup>**

|           | Replicates | $^{12}\text{C}^-$ Rich ROIs |                 |           | $^{12}\text{C}^-$ Less-Rich ROIs |                 |           |
|-----------|------------|-----------------------------|-----------------|-----------|----------------------------------|-----------------|-----------|
|           |            | ROIs                        | ROIs Area       | Intensity | ROIs                             | ROIs Area       | Intensity |
| Treatment | Number     | Number                      | /Total area (%) | (Pixel)   | Number                           | /Total area (%) | (Pixel)   |
| Control   | 8          | 312                         | 7.47            | >90       | 457                              | 40.18           | 40-90     |
| NPK       | 6          | 567                         | 10.80           | >90       | 532                              | 27.64           | 40-90     |
| NPKM      | 6          | 479                         | 8.23            | >50       | 596                              | 37.99           | 30-50     |

<sup>a</sup>Note: Control, no fertilization; NPK, chemical nitrogen, phosphorus and potassium fertilization; NPKM, chemical NPK plus swine manure fertilization.

35 **Table S3. Fe mineral standards used in the fitting of Fe K-edge XANES spectra**

| Fe mineral standards   | Mineral type                | Chemical formula                                                | Origin                     | References                                           |
|------------------------|-----------------------------|-----------------------------------------------------------------|----------------------------|------------------------------------------------------|
| <b>Ferrous sulfate</b> | Inorganic<br>ferrous oxides | $\text{FeSO}_4 \cdot 7\text{H}_2\text{O}$                       | Aladdin, CAS:7782-63-0     | -                                                    |
| <b>Ferrous oxalate</b> | Organic<br>ferrous oxides   | $\text{FeC}_2\text{O}_4 \cdot 2\text{H}_2\text{O}$              | Aladdin, CAS:6047-25-2     | -                                                    |
| <b>Ferric sulfate</b>  | Inorganic<br>ferric oxides  | $\text{Fe}_2(\text{SO}_4)_3 \cdot 2\text{H}_2\text{O}$          | Aladdin, CAS:10028-22-5    | -                                                    |
| <b>Ferric oxalate</b>  | Organic<br>ferric oxides    | $\text{Fe}_2(\text{C}_2\text{O}_4)_3 \cdot 5\text{H}_2\text{O}$ | Aladdin,<br>CAS: 2944-66-3 | -                                                    |
| <b>Goethite</b>        | Iron Oxide                  | $\alpha\text{-FeOOH}$                                           | Synthetic                  | Schwertmann & Cornell (2007b)                        |
| <b>Hematite</b>        | Iron Oxide                  | $\alpha\text{-Fe}_2\text{O}_3$                                  | Synthetic                  | Yen et al. (2002)<br>Schwertmann & Cornell (2007c)   |
| <b>Ferrihydrite</b>    | Iron Oxide                  | $\text{Fe}_5\text{HO}_8 \cdot 4\text{H}_2\text{O}$              | Synthetic                  | Michelet al. (2007)<br>Schwertmann & Cornell (2007a) |
| <b>Maghemite</b>       | Iron Oxide                  | $\gamma\text{-Fe}_2\text{O}_3$                                  | Synthetic                  | Wang et al. (2008)<br>Schwertmann & Cornell (2007d)  |

## References

- Michel, F.M., Ehm, L., Antao, S.M., Lee, P.L., Chupas, P.J., Liu, G., Strongin, D.R., Schoonen, M.A.A., Phillips, B.L., and Parise, J.B.: The structure of ferrihydrite, a nanocrystalline material, *Science*, 316, 1726-1729, 2007.
- 40 Mueller, C.W., Kölbl, A., Hoeschen, C., Hillion, F., Heister, K., Herrmann, A.M., and Kögel-Knabner, I.: Submicron scale imaging of soil organic matter dynamics using NanoSIMS-From single particles to intact aggregates, *Org. Geochem.*, 42, 1476-1488, 2012.
- Schwertmann, U., and Cornell, R.M.: *Ferrihydrite, Iron Oxides in the Laboratory*,  
45 Wiley-VCH Verlag GmbH, pp. 103-112, 2007a.
- Schwertmann, U., and Cornell, R.M.: *Goethite, Iron Oxides in the Laboratory*, Wiley-VCH Verlag GmbH, pp. 67-92, 2007b.
- Schwertmann, U., and Cornell, R.M.: *Hematite, Iron Oxides in the Laboratory*, Wiley-VCH Verlag GmbH, pp. 121-134, 2007c.
- 50 Schwertmann, U., and Cornell, R.M.: *Maghemite, Iron Oxides in the Laboratory*, Wiley-VCH Verlag GmbH, pp. 141-142, 2007d.
- Wang, X.G., Liu, C.S., Li, X.M., Li, F.B., and Zhou, S.G.: Photodegradation of 2-mercaptobenzothiazole in the  $\gamma$ -Fe<sub>2</sub>O<sub>3</sub>/oxalate suspension under UVA light irradiation, *J. Hazard. Mater.*, 153, 426-433, 2008.
- 55 Yen, F.S., Chen, W.C., Yang, J.M., and Hong, C.T.: Crystallite size variations of nanosized Fe<sub>2</sub>O<sub>3</sub> powders during  $\gamma$ - to  $\alpha$ -phase transformation, *Nano Lett.*, 2, 245-252, 2002.
