# Supplementary material for: In situ interactive characteristics of reactive minerals in soil colloids and soil carbon preservation differentially revealed by nanoscale secondary ion mass spectrometry and X-ray absorption fine structure spectroscopy
Source: Copernicus journal article supplement (doi:10.5194/bg-2015-625), 2016-01-20
Supplement: Supplementary file [file bg-2015-625-AC1-supplement.zip]

Dear Dr. Roland Bol,

We are submitting our revised manuscript entitled “**New strategies for submicron characterization the carbon binding of reactive minerals in long-term contrasting fertilized soils: Implications for soil carbon storage**” (Manuscript ID bg-2015-625) by [Jian Xiao, Xinhua He, Ying Zhou, Lirong Zheng, Jialong Hao, Wei Ran, Qirong Shen, **Guanghui Yu**] to **Biogeosciences**. In the revised manuscript, we believed that all the questions arising from Referee 1 were responded point-by-point. And all the revised parts were colored in red in the revised manuscript. Moreover, we found that the comments of Referee 1 are based on the original version (bg-2015-625-manuscript-version1, 04 Dec 2015) rather than the new version (bg-2015-625-manuscript-version2, 15 Jan 2016). However, we think this will not affect our responses, despite of some of the comments having been addressed in the version 2. We are very grateful to Referee 1 for every comment, which have truly helped improve the article.

We look forward to hearing your positive response.

Sincerely yours,

Guanghui

-----

Guanghui Yu, Ph.D

National Engineering Research Center for Organic-based Fertilizers

College of Resources & Environmental Sciences,

Nanjing Agricultural University,

6 Tongwei Road, Nanjing, Jiangsu Province 210095

P.R China

Phone: +86-25-84396212

Fax: +86-25-84395212

Email: [yuguanghui@njau.edu.cn](mailto:yuguanghui@njau.edu.cn)
